# Supplementary material for: Field-obtained carbon and nitrogen uptake rates of phytoplankton in the Laptev and East Siberian seas
Source: Copernicus journal article supplement (doi:10.5194/bg-2017-234), 2017-07-12
Supplement: Supplementary file [file bg-2017-234-AC1-supplement.pdf]

1       **Field-obtained carbon and nitrogen uptake rates of phytoplankton**  
2                               **in the Laptev and East Siberian seas**

3  
4   **Sang Heon Lee<sup>1\*</sup>, Jang Han Lee<sup>1</sup>, Howon Lee<sup>1</sup>, Jae Joong Kang<sup>1</sup>, Jae Hyung Lee<sup>1</sup>,**  
5   **Dabin Lee<sup>1</sup>, SoHyun An<sup>1</sup>, SeungHyun Son<sup>2</sup>, Dean A. Stockwell<sup>3</sup>, Terry E. Whitledge<sup>3</sup>**

6  
7   \* corresponding author

8  
9   <sup>1</sup>Department of Oceanography, Pusan National University, Busan 609-735, Korea

10   <sup>2</sup>CIRA, Colorado State University, Fort Collins, CO, USA

11   <sup>3</sup>Institute of Marine Science, University of Alaska, Fairbanks, AK 99775, USA

12

### 13 Abstract

14 The Laptev and East Siberian seas are the least biologically studied region in the Arctic  
15 Ocean, although they are highly dynamic in terms of active processing of organic matter  
16 impacting the transport to the deep Arctic Ocean. Field-measured measurements of carbon  
17 and nitrogen uptake rates of phytoplankton were conducted in the Laptev and East Siberian  
18 seas from August 21 to September 22, 2013 as part of the NABOS (Nansen and Amundsen  
19 Basins Observational System) program. Major inorganic nutrients were mostly depleted at  
20 100-50% light depths but were not depleted within the euphotic depths in the Laptev and  
21 East Siberian seas. The water column-integrated chl-*a* concentration in this study was  
22 significantly higher than that in the western Arctic Ocean (t-test,  $p \leq 0.01$ ). ~~Unexpectedly,~~  
23 ~~¶~~The daily carbon and nitrogen uptake rates in this study (average  $\pm$  S.D. =  $110.3 \pm 88.3$  mg  
24  $\text{C m}^{-2} \text{d}^{-1}$  and  $37.0 \pm 25.8$  mg  $\text{N m}^{-2} \text{d}^{-1}$ , respectively) are within previously reported ranges.  
25 Surprisingly, the annual primary production ( $13.2 \text{ g C m}^{-2}$ ) measured in the field during the  
26 vegetative season is approximately one order of magnitude lower than the primary  
27 production reported from a satellite-based estimation. Further validation using field-  
28 measured observations is necessary for a better projection of the ecosystem in the Laptev  
29 and East Siberian seas responding to ongoing climate change.

30

### 31 Keywords

32 Laptev and East Siberian seas, NABOS, carbon and nitrogen uptake rates of phytoplankton

## 33 **1. Introduction**

34 The most dramatic environmental change in the Arctic Ocean has been the rapid and  
35 extensive decrease in sea ice extent and thickness over the recent decades (Comiso 2006;  
36 Overland and Wang, 2013; Overland et al., 2014). Sea ice is a major controlling factor for  
37 primary production of pelagic phytoplankton by modulating water column stratification and  
38 light fields (Hill et al. 2005; Gradinger 2009; Bélanger et al., 2013), although nutrient supply  
39 to the surface water have been proposed as the main controlling factor in seasonally ice-free  
40 open waters (Tremblay and Gagnon, 2009). Consequently, these sea ice changes will affect  
41 primary productivity as well as physiological status of primary producers (Lee et al. 2008,  
42 2010; more refs) and thus carbon cycling in the Arctic Ocean (Arrigo et al. 2008; Bates and  
43 Mathis 2009; Cai et al. 2010). Some evidence for the impacts of environmental changes on  
44 phytoplankton have been already reported in various regions in the Arctic Ocean (Arrigo et  
45 al., 2008; Li et al., 2009; Wassmann et al., 2011; Ardyna et al., 2014). Several studies have  
46 reported increasing signs of annual primary production due to enhanced light availability to  
47 phytoplankton as a main consequence of recent increasing open area and longer open period  
48 in the Pan-Arctic regions from 1998 to 2009 (Arrigo et al. 2008; Arrigo and Dijken, 2011).  
49 In contrast, a restrained primary production was reported as a result of increasing cloudiness  
50 in the Arctic Ocean (Bélanger et al., 2013) due to warmer temperature and moisture fluxes in

51 newly open waters during summer and early fall (Eastman and Warren, 2010; Vavrus et al.,  
52 2010). To date increasing or decreasing in the primary production ~~of primary producers~~ as a  
53 consequence of ongoing environmental changes is still being debated in the Arctic Ocean  
54 (Lee and Whitley, 2005; Coupel et al., 2015). However, it is clear that these  
55 environmental changes will have great effects on the ecosystem from altering the patterns of  
56 primary production to changing the trophic structure and the elemental cycling pathways  
57 (Grebmeier et al. 2006).

58 The Laptev and East Siberian seas are situated on the widest and shallowest continental  
59 shelf in the world ([Semiletov et al., 2005](#)). Both seas are highly dynamic in terms of organic  
60 matter production and processing, impacting the atmospheric exchange and the transport of  
61 organic matter to the deep Arctic Ocean (Semiletov et al., 2005; Anderson et al., 2009).  
62 However, the Laptev and East Siberian seas are among the least biologically studied regions  
63 in the Arctic Ocean (Semiletov et al., 2005; Arrigo and Dijken, 2011; [Hill et al., 2017](#)).  
64 [Especially, primary production measurements are chronically scarce in this region based on](#)  
65 [the ARCSS-PP \(Arctic System Science Primary Production\) database 1950 to 2007 \(Hill et](#)  
66 [al., 2017\)](#). Although various physical data on hydrography and ocean circulation have been  
67 reported by the continuous NABOS (Nansen and Amundsen Basins Observational System)  
68 program (Dmitrenko et al., 2006; ~~[Bauch et al., 2014](#)~~; ~~[Aksenov et al., 2011](#)~~; Polyakov et al.,

69 | 2007; [Aksenov et al., 2011](#); [Bauch et al., 2014](#)), no *in situ* measurements of recent  
70 | phytoplankton productivity or nutrient concentrations have been conducted in the Laptev or  
71 | East Siberian seas during the program.

72 | In this study, *in situ* carbon and nitrogen uptake rates of phytoplankton were measured to  
73 | quantify the primary productivity and evaluate nitrogen uptake in the Laptev and East  
74 | Siberian seas as part of the NABOS program. These data will provide the basic groundwork  
75 | for future monitoring of the marine ecosystems as it responds to ongoing climate change in  
76 | the Laptev and East Siberian seas and will provide valuable *in situ* measurements for  
77 | validating the ranges of phytoplankton primary production estimated from satellite ocean  
78 | color data.

79

## 80 | **2. Materials and Methods**

81 | ~~Field-measured eC~~Carbon and nitrogen uptake rates of phytoplankton were measured  
82 | at 19 monitoring stations selected from a total of 116 NABOS stations (Fig. 1; Table 1) in  
83 | the Laptev and East Siberian seas from August 21 to September 22, 2013 onboard the  
84 | Russian vessel “*Akademik Fedorov*”. After samples for concentrations of major inorganic  
85 | nutrient and chlorophyll-*a* (chl-*a*) were collected at 19 productivity stations, they were  
86 | analyzed onboard during the cruise. Nutrient concentrations (nitrate, nitrite, ammonia,

87 phosphate, and silicate) were analyzed using an Alpkem Model 300 Rapid Flow Nutrient  
88 Analyzer (5 channels) based on the method of Whitley et al. (1981). Total and size-  
89 fractionated chl-*a* samples were obtained from 6 light depths (100, 50, 30, 12, 5, and 1 %) and 3 light depths (100, 30, and 1%), respectively. The chl-*a* samples were prepared based  
90 on the same procedure reported from previous studies in the Arctic Ocean (Lee et al., 2005;  
91 Lee et al., 2012). Water samples for chl-*a* concentrations were filtered onto Whatman GF/F  
92 (24 mm) and samples for size-fractionated chl-*a* were passed sequentially through 20 µm  
93 and 5 µm pore-sized Nucleopore filters (47 mm) and 0.7 µm pore-sized Whatman GF/F  
94 filters (47 mm). The filters were kept frozen in a freezer (-80 °C) before further analysis.  
95 The frozen chl-*a* samples were extracted in 90% acetone at -5°C for 24 hours, and the  
96 concentrations were measured on board using a pre-calibrated Turner Designs model 10-AU  
97 fluorometer.

98 On-deck incubations for carbon and nitrogen uptake rates of phytoplankton were conducted  
99 using a <sup>13</sup>C-<sup>15</sup>N-dual tracer technique previously performed in various regions of the Arctic  
100 Ocean (Lee and Whitley 2005; Lee et al., 2007; ~~&~~ 2012, Yun et al., 2015). Six *in situ*  
101 photic depths (100, 50, 30, 12, 5, and 1%) were determined at each station by converting  
102 Secchi disc depth to light ~~intensity~~ depth according to Lambert-Beer's law. It would be better  
103 to have radiance or optical measurements for more accurate estimation of euphotic depths or  
104

105 diffuse attenuation coefficients for PAR,  $K_d(\text{PAR})$ . Since we do not have underwater PAR  
106 sensor (and/or optical instruments) due to logistic problems, the light depths were  
107 determined by Secchi disc which has been widely and commonly used in various oceans as  
108 well as the Arctic Ocean to derive euphotic depth and  $K_d(\text{PAR})$  (Son et al., 2005; Tremblay  
109 et al., 2000; Lee et al. 2012; Lee et al., 2017a; Lee et al., 2017b). From several previous  
110 studies in the Arctic Ocean, we compared the light depths between the two methods of  
111 Secchi disc and underwater PAR sensor and found that they were matched quite well  
112 (unpublished data).

113 Seawater samples at each light depth were transferred from the Niskin bottles to acid-  
114 cleaned polycarbonate incubation bottles (approximately 1 L) matched each light depth.  
115 Then, heavy isotope-enriched (98–99 %) solutions of  $\text{NaH}^{13}\text{CO}_3$ ,  $\text{K}^{15}\text{NO}_3$ , or  $^{15}\text{NH}_4\text{Cl}$  were  
116 added to the polycarbonate incubation bottles at concentrations of  $\sim 0.3$  mM,  $\sim 0.8$   $\mu\text{M}$ , and  
117  $\sim 0.1$   $\mu\text{M}$  for  $^{13}\text{CO}_2$ ,  $^{15}\text{NO}_3$ , and  $^{15}\text{NH}_4$ , respectively. The carbon isotope enrichment was 5–  
118 10% of the total inorganic carbon in the ambient water determined during the cruise. In  
119 contrast, the concentrations of  $^{15}\text{NO}_3$  and  $^{15}\text{NH}_4$  additions were greater than 10 % of the  
120 ambient nitrate and ammonium concentrations at several stations with very low  
121 concentrations. The waters injected with isotopes were incubated in big incubators on deck  
122 under natural light conditions with cooled with surface seawater for 4 to 6 hours. So, the

123 light conditions were not constant during the incubation hours among the productivity  
124 stations. After ~~4 to 6 hour~~the incubations ~~on deck done~~, the filters used for the isotopic  
125 measurements as well as particulate organic carbon (POC) and particulate nitrogen  
126 (PONPN) were immediately preserved at  $-20^{\circ}\text{C}$  for further mass spectrometric analysis  
127 (Finnigan Delta+XL) in the stable isotope laboratory of University of Alaska Fairbanks, US.  
128 The uncertainties for  $\delta^{13}\text{C}$  and  $\delta^{15}\text{N}$  measurements were  $\pm 0.1\text{‰}$  and  $\pm 0.3 \text{‰}$ , respectively.  
129 Calculations of the carbon and nitrogen uptake rates of phytoplankton were based on the  
130 methods from Hama et al. (1983) and Dugdale and Goering (1967). Carbon uptake rates  
131 were obtained as follows:  
132 Carbon uptake rate =  $\text{POC}_{\text{incubation}} \times [^{13}\text{C}_{\text{excess}} / (^{13}\text{C}_{\text{enriched}} * t)]$ ,  
133 where  $\text{POC}_{\text{incubation}}$  is the concentration of particulate organic carbon after incubation,  
134  $^{13}\text{C}_{\text{excess}}$  is the excess  $^{13}\text{C}$  [concentration of  $^{13}\text{C}$  in the particulate phase after incubation –  
135 natural abundance of  $^{13}\text{C}$  in the particulate phase],  $^{13}\text{C}_{\text{enriched}}$  is the  $^{13}\text{C}$  enrichment in the  
136 dissolved fraction, and t is the time duration of incubation in hours. Since the discrimination  
137 factor for  $^{13}\text{C}/^{12}\text{C}$  (1.025; Hama et al., 1984) was not considered, the production rate  
138 calculated in this study could be somewhat underestimated. Nitrogen uptake rate was  
139 obtained same as carbon uptake rate. Dark carbon uptake values were subtracted from light  
140 carbon uptake values since the measured dark uptake rates were assumed from bacterial



141 processes (Gosselin et al. 1997). Integrated values of the carbon and nitrogen uptake rates of  
142 phytoplankton were calculated from surface (100 %) to 1 % light depths based on the  
143 trapezoidal rule. The  $f$  ratio was calculated as a fraction of nitrate uptake rate to the sum of  
144 nitrate and ammonium uptake rates in this study (Eppley and Peterson, 1979).

145

146

### 147 3. Results and Discussion

148 The sea surface temperature and salinity values ranged from  $-1.76$  °C to  $1.62$  °C and  
149  $28.29$  to  $33.44$ , respectively (Table 1). Sea ice concentration averaged during the cruise  
150 period in 2013 retrieved from National Snow & Ice Data Center ranged from 0 % to 100 %  
151 (Table 1).

152 The vertical concentrations of major inorganic nutrients except nitrite+nitrate shown in  
153 Fig. 2 were generally consistent from surface to 1 % light depth at each station although they  
154 were largely variable among the productivity stations. In comparison, the concentrations of  
155 nitrite+nitrate were homogeneous within 20 m water depth (approximately 30 % light depth)  
156 at the most stations and then increased rapidly below the depth. The concentration of  
157 nitrite+nitrate (mostly nitrate) at surface ranged from  $0$   $\mu\text{M}$  to  $2.11$   $\mu\text{M}$  (average  $\pm$  S.D. =  
158  $0.53 \pm 0.65$   $\mu\text{M}$ ). The concentrations of major inorganic nutrients (~~nitrite+nitrate,~~

159 ~~ammonium, phosphate, and silicate~~ were integrated from surface to 50 m water depth  
160 because the average euphotic water column was 49.6 m (S.D. =  $\pm 10.6$  m) during our cruise  
161 period in 2013 (Fig. 23a-d). The concentrations of nitrite+nitrate and ammonium were 19.3-  
162 189.3  $\text{mmol m}^{-2}$  and 2.5-39.7  $\text{mmol m}^{-2}$ , respectively (Fig. 23a & b). The concentration of  
163 DIN (nitrite+nitrate+ammonium) was 25.8-213.7  $\text{mmol m}^{-2}$ . The concentrations of  
164 phosphate and silicate were 7.6-39.7  $\text{mmol m}^{-2}$  and 19.5-329.7  $\text{mmol m}^{-2}$ , respectively (Fig.  
165 23c & d). Generally, high concentrations of nitrite+nitrate and phosphate were found at  
166 AF005, AF068, AF071, and AF100 and they were relatively higher in the Laptev  
167 Seawestern part than in the East-Siberian-Sea-eastern part of the studied region (Fig. 23a &  
168 c). In contrast, the pattern of silicate concentration ~~is appeared showed~~ opposite as those of  
169 nitrite+nitrate and phosphate. The silicate concentration was higher in the East-Siberian  
170 Sea-eastern side than in the Laptev-Sea-western part (Fig. 32d). Generally, the integrated  
171 nutrient concentrations were not depleted within the euphotic depths. Rather, they (except  
172 silicate) were nearly depleted in the upper layers (< 10 m), which represented approximately  
173 50 % light depth in this study (Fig. 2). Our findings are consistent with the previous results  
174 in the Laptev and East Siberian seas obtained by Codispoti and Richards (1968) who  
175 observed that the concentrations of phosphate and nitrate ~~arewere~~ so low as to indicate  
176 nutrient limitation for phytoplankton production in the upper layers. ~~However, our stations~~

177 ~~were substantially deeper (> 200 m bottom depth; Table 1) than those in Codispoti and~~  
 178 ~~Richards (1968) which were generally located in shallow shelf regions (< 50 m).~~

179 The vertical patterns of chl-*a* concentrations were largely variable from surface to  
 180 1 % light depth among the productivity stations but the chl-*a* concentrations generally  
 181 decreased with depth except several stations with strong sub-surface chl-*a* maximum layers  
 182 (Fig. 4). Surface chl-*a* concentrations ranged from 0.23 mg chl-*a* m<sup>-3</sup> at AF049 to 2.05 mg  
 183 chl-*a* m<sup>-3</sup> at AF019 with an average of 0.64 mg chl-*a* m<sup>-3</sup> (S.D. = ± 0.51 mg chl-*a* m<sup>-3</sup>) which  
 184 are significantly (t-test, p < 0.01) higher than those (< 0.1 mg chl-*a* m<sup>-3</sup>) in previous studies  
 185 (Lee and Whitledge, 2005; Lee et al., 2012; Yun et al., 2015) from different regions in the  
 186 Western Arctic Ocean. Water column-integrated chl-*a* concentrations from surface to ~~50 m~~  
 187 ~~water~~ 1 % light depth ranged from 9.9 mg chl-*a* m<sup>-2</sup> at AF036 to 59.8 mg chl-*a* m<sup>-2</sup> at AF091  
 188 (average ± S.D. = 25.7 ± 14.2 mg chl-*a* m<sup>-2</sup>) in this study (Fig. ~~35~~). In comparison to other  
 189 deep waters in the western Arctic Ocean, this range is significantly higher (t-test, p ~~>~~ 0.01)  
 190 than those in the ice-free deep waters (6.4-24.8 mg chl-*a* m<sup>-2</sup>) and the newly opened deep  
 191 waters (7.1-15.1 mg chl-*a* m<sup>-2</sup>) in the northern Chukchi Sea from mid-August to early  
 192 September in 2008 (Lee et al., 2012) and in the Canada Basin from mid-August to early  
 193 September in ~~2002~~ (1.6-16.7 mg chl-*a* m<sup>-2</sup>; Lee and Whitledge, 2005). Furthermore, the  
 194 recent study in the northeast Chukchi Sea and the western Canada Basin showed a similar

195 | lower range of euphotic-integrated chl-*a* concentration (8.3-9.7 mg chl-*a* m<sup>-2</sup>) during the  
196 | early summer period with mostly sea ice cover from mid-July to mid-August, 2010 (Yun et  
197 | al., 2015). Generally, small sized-cells (0.7-5 μm) of phytoplankton appear to be dominant  
198 | in the euphotic water columns of the Laptev and East Siberian seas based on the size-  
199 | fractionated chl-*a* data in this study (Fig. 46). The contributions of small sized-cells  
200 | averaged from all the stations were 63.3 (S.D. = ± 17.5 %), 61.4 (S.D. = ± 19.9 %), and  
201 | 59.0 % (S.D. = ± 18.4 %) at 100, 30, and 1 % light depths, respectively. These ranges are  
202 | similar to that (64.3 %) in the western Canada Basin (Yun et al., 2015). However, the  
203 | contributions of small-sized cells in the Canada Basin reported by Lee and Whitledge (2005)  
204 | are somewhat higher (69.3 %) at the surface but lower (44.4 %) at chl-*a* maximum layer at  
205 | 50-60 m than those in this study although they were not statistically significant (t-test,  $p >$   
206 | 0.05).

207 |         The water column-integrated hourly carbon uptake rates ~~was~~ ~~were~~ 0.89-16.60 mg C  
208 | m<sup>-2</sup> h<sup>-1</sup> (average ± S.D. = 4.83 ± 3.52 mg C m<sup>-2</sup> h<sup>-1</sup>) in this study (Fig. 57). The highest rate  
209 | was observed at AF019 and the lowest rate was at AF005. The remarkably high uptake rate  
210 | at AF019 among other productivity stations were mainly due to relatively higher particulate  
211 | organic carbon (POC) concentrations and specific carbon uptake rates at upper light depths  
212 | (> 30 % light level). Vertically, the hourly carbon uptake rates were generally highest at the

213 100-50% light levels among the six different light depths (data not shown). The water  
214 column-integrated hourly nitrate and ammonium uptake rate ranges were 0.05-1.96 mg N m<sup>-2</sup>  
215 h<sup>-1</sup> (average ± S.D. = 0.48 ± 0.52 mg N m<sup>-2</sup> h<sup>-1</sup>) and 0.19-3.37 mg N m<sup>-2</sup> h<sup>-1</sup> (average ± S.D.  
216 = 1.06 ± 0.76 mg N m<sup>-2</sup> h<sup>-1</sup>), respectively (Fig. 68). Generally, the ammonium uptake rates  
217 were relatively higher than the nitrate uptake rates during our cruise period. The total  
218 nitrogen (nitrate + ammonium) uptake rate ranged from 0.25 mg N m<sup>-2</sup> h<sup>-1</sup> at AF044 to 4.49  
219 mg N m<sup>-2</sup> h<sup>-1</sup> at AF019. No specific pattern was observed in the spatial distribution of the  
220 carbon and nitrogen uptake rates of phytoplankton in this study.

221 Assuming a 24-h photoperiod per day during the summer period in the Arctic Ocean  
222 (Subba Rao and Platt 1984; Lee and Whitledge 2005; Lee et al., 2010) for a comparison  
223 purpose, the daily carbon and nitrogen (nitrate + ammonium) uptake rates of phytoplankton  
224 varied substantially, with ranges of 9.9-398.3 mg C m<sup>-2</sup> d<sup>-1</sup> (average ± S.D. = 110.3 ± 88.3  
225 mg C m<sup>-2</sup> d<sup>-1</sup>) and 6.0-107.7 mg N m<sup>-2</sup> d<sup>-1</sup> (average ± S.D. = 37.0 ± 25.8 mg N m<sup>-2</sup> d<sup>-1</sup>),  
226 respectively. Although the water column-integrated chl-*a* concentration is significantly  
227 higher (approximately five-fold) in this study than in other deep waters in the western Arctic  
228 Ocean, as previously mentioned above, our mean daily carbon uptake rate (110.9 mg C m<sup>-2</sup>  
229 d<sup>-1</sup>) are relatively equivalent to previously reported rates (Cota et al., 1996; Lee and  
230 Whitledge, 2005; Hill et al., 2017). Cota et al. (1996) and Lee and Whitledge (2005)

231 obtained rate of  $123.5 \text{ mg C m}^{-2} \text{ d}^{-1}$  and  $106 \text{ mg C m}^{-2} \text{ d}^{-1}$  in the Canada Basin, respectively.  
232 However, the mean daily carbon rates in the northeast Chukchi Sea ( $29.8 \text{ mg C m}^{-2} \text{ d}^{-1}$ ) and  
233 western Canada Basin ( $20.6 \text{ mg C m}^{-2} \text{ d}^{-1}$ ) reported by Yun et al. (2015) were substantially  
234 lower than those in other measurements. These lower values are mainly due to their  
235 measurements conducted in the early ice-opening season with a considerably heavy sea ice  
236 concentration over 70 % (Yun et al., 2015). The sea ice concentration in this study ranged  
237 widely from 0 % to 100 %, mostly ice free conditions with an average of 20 % during the  
238 cruise period (Table 1).

239 The mean daily nitrogen uptake rate (average  $\pm$  S.D. =  $37.0 \pm 25.8 \text{ mg N m}^{-2} \text{ d}^{-1}$ ) is  
240 comparable to the rates previously reported in the western Arctic Ocean (Lee and Whitledge,  
241 2005; Lee et al., 2012). Lee and Whitledge (2005) measured  $30.5 \text{ mg N m}^{-2} \text{ d}^{-1}$  (S.D. =  $\pm$   
242  $16.2 \text{ mg N m}^{-2} \text{ d}^{-1}$ ) in the Canada Basin, and Lee et al. (2012) observed  $33.4 \text{ mg N m}^{-2} \text{ d}^{-1}$   
243 (S.D. =  $\pm 18.4 \text{ mg N m}^{-2} \text{ d}^{-1}$ ) in the deep, ice-free northern Chukchi Sea. Based on the nitrate  
244 and ammonium uptakes rates, the  $f$ -ratio averaged from all the productivity stations in this  
245 study was 0.28 (S.D. =  $\pm 0.17$ ; Fig. 79), which is comparable to the average  $f$ -ratios (0.22-  
246 0.34) previously reported in the western Arctic Ocean (Lee and Whitledge, 2005; Lee et al.,  
247 2012; Yun et al., 2012; Codispoti et al., 2013). The low  $f$ -ratio estimated in this study  
248 indicates that the predominant nitrogen source for phytoplankton growth was ammonium at

249 that time of sampling. There are two possible explanations for that result: the low amount of  
250 nitrate available for phytoplankton growth (Kim et al., 2015) and the existence of low light  
251 growth conditions (Lee and Whitledge, 2005; Yun et al., 2012). The nitrate uptakes of  
252 phytoplankton are reported to be more strongly coupled with light than ammonium uptakes  
253 (Dortch and Postel 1981). Relatively low  $f$ -ratios were observed overall in the Laptev and  
254 East Siberian seas even though there were some nitrate concentrations available within the  
255 euphotic water depths (Fig. 3). In fact, no strong relationship between  $f$ -ratio and euphotic  
256 water depth-integrated concentration of nitrite+nitrate was found in this study ( $R^2 = 0.02$ ).  
257 This provides indirect evidence for potential light-limited conditions for phytoplankton  
258 growth in the Laptev and East Siberian seas during the study period. However, we need to  
259 be cautious for the conclusion of light-limited phytoplankton growth in this study. Based on  
260 the size-fractionated chl- $a$  concentrations, major contributors to the phytoplankton  
261 community in this region were small sized-cells throughout the euphotic water columns in  
262 this study (Fig. 6). Generally, these small sized-cells prefer ammonium than nitrate as a  
263 nitrogen source for their growth (Tremblay et al., 2002; Lee et al., 2012). In fact, Lee et al.  
264 (2012) observed significantly lower  $f$ -ratios for small sized-cells in the Western Arctic  
265 Ocean. Therefore, the low  $f$ -ratios in this study could be caused by relative ammonium  
266 preference of the small cells-dominant phytoplankton community in in the Laptev and East

267 Siberian seas during the study period.

268 Codispoti et al. (2013) suggests that a nutrient-limited condition of phytoplankton  
269 production exists in the Laptev and East Siberian seas because of limited inorganic nutrient  
270 availability (phosphate and nitrate) at the surface (Codispoti and Richards, 1968). Generally,  
271 carbon/nitrogen (C/N) ratios have been used to an indicator of nutrient condition of  
272 phytoplankton (Smith and Sakshaug 1990; Lee and Whitledge, 2005; Yun et al., 2012). For  
273 example, high C/N ratios are often indicative of nitrogen deficiency for phytoplankton  
274 growth (Smith and Sakshaug 1990). The C/N ratio of particulate organic matters and  
275 assimilated C/N ratio averaged from all the productivity stations were 7.23 ( $\pm$  5.51) and 7.03  
276 ( $\pm$  5.14), respectively in this study. These C/N ratios similar to the Redfield ratio (6.6)  
277 indicate no strong nutrient-limited condition of phytoplankton production during the cruise  
278 period in 2013. In this study, the relatively lower daily carbon uptake rate despite of  
279 significantly higher chl-*a* concentration could be caused by a potential light-limited growth  
280 condition of phytoplankton in the Laptev and East Siberian seas. In fact, there was no strong  
281 relationship between water column-integrated POC and chl-*a* concentrations as  
282 representative biomass for phytoplankton and daily carbon uptake rate in this study ( $R^2 =$   
283 0.001), which indicates that phytoplankton biomass itself is not a main factor for the  
284 different carbon uptake rates from the productivity stations during this cruise period.



285 However, no relationship between POC and chl-*a* concentrations in this study could be  
286 caused by natural characteristics of POC samples since it normally includes all suspended  
287 organic carbon (detritus, bacteria, microzooplankton, etc.) as well as phytoplankton carbon.  
288 In general, the ratio of C/chl-*a* is lower for phytoplankton under low light conditions than  
289 under high light conditions, although it is highly variable depending on all other  
290 environmental conditions that affect the growth rate of phytoplankton (Smith and Sakshaug,  
291 1990). Based on cultures of polar or subpolar phytoplankton, the ratio ranges from 20-50 in  
292 low light conditions to 100-200 in high light conditions (Smith and Sakshaug, 1990). In fact,  
293 Lee and Whitley (2005) found that ratios in the Canada Basin (16.8 at approximately 2%  
294 light level of surface irradiance to 314 at surface water) were comparable to the laboratory-  
295 measured ratios. In this study, the C/chl-*a* ratio averaged from all the productivity stations  
296 was 290.8 (S.D. = ± 164.4), which indicates no light-limited condition. Since POC contains  
297 not only phytoplankton carbon but also all suspended organic carbon, the C/chl-*a* ratio might  
298 not be a good indicator in the Laptev and East Siberian seas with large terrestrial inputs  
299 during the ice-free summer season (Macdonald et al., 2010; Anderson et al., 2011).

300 At this point, we do not have a good explanation for the lower carbon uptake rate  
301 despite of substantially high chl-*a* concentration of phytoplankton in the Laptev and East  
302 Siberian seas during our observation period. Based on various indicators [in this study](#), the

303 growth of phytoplankton in the Laptev and East Siberian seas may have experienced a light-  
304 limited condition as well as the nutrient-limited condition, both of which are generally  
305 considered to occur in the Arctic Ocean during the summer periods (Codispoti and Richards,  
306 1968; Codispoti et al., 2013).

307 For a comparison purpose, same assumptions used previously in the Arctic Ocean  
308 were applied for estimating the annual primary production in this study. Assuming Based on  
309 a 120-day growing season and the sameconstant daily productivity over the growing season  
310 in the Arctic Ocean (Subba Rao and Platt, 1984; Gosselin et al. 1997; Lee and Whitledge  
311 2005; Lee et al. 2012; Yun et al., 2015), the annual primary production ( $13.2 \text{ g C m}^{-2}$ ) during  
312 the arctic vegetative season roughly estimated in this study is comparable to the indirect  
313 estimation ( $9.6 \text{ g C m}^{-2}$ ) from drawdown measurements of dissolved inorganic carbon in the  
314 East Siberian Sea (Anderson et al., 2011). In addition, Hill et al. (2017) confirmed the  
315 annual primary production of  $8 \text{ g C m}^{-2}$  in the East Siberian Sea which is consistent with  
316 other estimates (Codispoti et al., 2013; Popova et al., 2010), based on the seasonal *in situ*  
317 primary production data from the ARCSS-PP database. However, these productions levels  
318 are substantially (approximately one order magnitude) lower than the mean productions  
319 estimates ( $101\text{-}121 \text{ g C m}^{-2}$ ) in the Laptev and Siberian seas for 1998-2009 estimated from  
320 satellite-based measurements (Arrigo and Dijken 2011). Unfortunately, no annual primary

321 production estimated in 2013 by Arrigo and Dijken (2011) makes difficult for a direct  
322 comparison of annual productions in 2013 between our measured rates and their satellite-  
323 based rates. In fact, uncertainties associated with each productivity-derived method  
324 specifically versus *in situ* measurements versus satellite-based methods are complicated  
325 (Grebmeier et al. 2015). *In situ* measurements could be open to various incubation artifacts  
326 whereas satellite imagery could be biased low and high in the Arctic Ocean (Grebmeier et al.  
327 2015). An overestimation of satellite-derived primary production in the Arctic Ocean is  
328 generally caused by an overestimation of chl-*a* concentration from massive colored  
329 dissolved organic matter (CDOM) of terrestrial origin and degraded phytoplankton  
330 (Guéguen et al., 2007; Matsuoka et al., 2011; Lewis et al., 2016). Indeed, large terrestrial  
331 inputs of dissolved and particulate organic matter are transported from substantial inputs of  
332 river runoff such as from the Lena, Indigirka, and Kolyma rivers to the shelves of the Laptev  
333 and East Siberian seas during the ice-free summer season (Macdonald et al., 2010; Anderson  
334 et al., 2011). Arrigo and Dijken (2011) also discussed a potential overestimation by the  
335 CDOM which causes some overestimation in surface chl-*a* and thus net primary production  
336 from satellite-based approaches. However, they argued that the overestimation of net  
337 primary production as high as 6.1 % is nearly equivalent to the underestimated portion  
338 (7.6 %) by missing subsurface chl-*a* maximum (SCM) layer in the Arctic Ocean. In this

339 study, the SCM layers were also detected ~~but not~~ common in overall productivity stations (~~6~~  
340 ~~stations out of 19 productivity stations~~) during the cruise period (~~data not shown~~Fig. 4).

341 ~~However~~Regional coverages could cause the difference in the annual primary productions  
342 between this and their studies. The geographic sectors defined by Arrigo and Dijken (2011)  
343 include a large part of coastal regions which have generally high primary productivities  
344 (Arrigo et al., 2008). By comparison, our productivity stations were located in deep waters  
345 (> 200 m bottom depth; Table 1) which have relatively lower primary productivities (Arrigo  
346 et al., 2008).

347 In spite of the considerations for potential difference between the two methods, our  
348 field-measured annual production is surprisingly lower compared to the satellite-derived  
349 production in the Laptev and East Siberian seas, ~~although our productivity in this study were~~  
350 ~~executed at one time period in 2013.~~ At this stage, our simple comparison of the primary  
351 production between this study and the satellite based-study is preliminary since our  
352 productivity measurements in this study are very limited for one time period in 2013. Based  
353 on more field measurements from different seasons and years as well as coastal regions.  
354 Further careful validation between the two different methods (field measurement vs.  
355 satellite-derived approach) is needed for a better understanding of the least biologically  
356 studied region undergoing severe and ongoing environmental changes in the Arctic Ocean.

357

#### 358 4. Summary and Conclusion

359 Field-measured phytoplankton productivity and nutrient concentrations were obtained in  
360 the Laptev and East Siberian seas, one of the least biologically studied regions in the Arctic  
361 Ocean (Semiletov et al., 2005; Arrigo and Dijken, 2011), during the NABOS (Nansen and  
362 Amundsen Basins Observational System) cruise from August 21 to September 22, 2013  
363 (Fig. 1).

364 During the cruise period, the nutrient concentrations within the euphotic depths were not  
365 depleted although they were depleted in the upper layers which are consistent with the  
366 previous results (Fig. 2). The euphotic water column-integrated chl-*a* concentration ( $25.7 \pm$   
367  $14.2 \text{ mg chl-}a \text{ m}^{-2}$ ; Fig. 3) was significantly higher in this study than those previously  
368 reported in the other parts of the Arctic Ocean (Lee and Whitley, 2005; Lee et al., 2012).  
369 Among the different cell sizes of phytoplankton, small phytoplankton were dominant  
370 (approximately 60 %) in the Laptev and East Siberian seas (Fig. 4). Based on the low *f*-ratio  
371 ( $0.28 \pm 0.17$ ; Fig. 7) observed in this study, ammonium appears to be the predominant  
372 nitrogen source for phytoplankton growth in the Laptev and East Siberian seas during our  
373 sampling period although there were some nitrate concentrations available within the  
374 euphotic depths.

375 The daily carbon uptake rate ( $110.3 \pm 88.3 \text{ mg C m}^{-2} \text{ d}^{-1}$ ) and nitrogen uptake rate ( $37.0 \pm$   
376  $25.8 \text{ mg N m}^{-2} \text{ d}^{-1}$ ) in this study were somewhat comparable to the rates previously reported  
377 in the Arctic Ocean (Cota et al., 1996; Lee and Whitledge, 2005; Lee et al., 2012). This is a  
378 surprising result since the water column-integrated chl-*a* concentration in this study is  
379 significantly higher (approximately five-fold) compared to the previous results. Various  
380 indicators determining light or nutrient-limited conditions were suggested for the mismatch  
381 between the higher chl-*a* concentration and relatively lower carbon and nitrogen uptake  
382 rates. However, no consistent results were obtained because of some inherent problems of  
383 POC including all suspended organic carbon in addition to phytoplankton carbon.

384 The annual primary production ( $13.2 \text{ g C m}^{-2}$ ) estimated in this study is somewhat  
385 equivalent to the indirect measurements ( $9.6 \text{ g C m}^{-2}$ ) from dissolved inorganic carbon ~~in the~~  
386 ~~East Siberian Sea~~ (Anderson et al., 2011) and  $8 \text{ g C m}^{-2}$  based on the ARCSS-PP database  
387 (Hill et al., 2017) in the East Siberian Sea. However, the satellite-based estimations ( $101-$   
388  $121 \text{ g C m}^{-2}$ ) reported by Arrigo and Dijken (2011) were substantially higher in the Laptev  
389 and Siberian seas. This large discrepancy between the field-measured and satellite-derived  
390 primary productions ~~might be caused by the overestimated chl-*a* concentration and primary~~  
391 ~~production from CDOM of degraded phytoplankton and terrestrial origin (Guéguen et al.,~~  
392 ~~2007; Matsuoka et al., 2011) was discussed.~~ but our simple comparison is preliminary at

393 | [this stage](#). More field-measured data are needed to understand the mismatch between the  
394 chl-*a* concentration and primary production and will be valuable for further validation of  
395 satellite-derived primary productions in the Laptev and East Siberian seas.

396

397

### 398 **Acknowledgments**

399 We thank the captain and crew of the *Akademik Fedorov* for their outstanding assistance  
400 during the cruise. This research was supported by the Korea Research Foundation (KRF)  
401 grant funded by the Korea government (MEST; No. 2016015679). Support for T. E.  
402 Whitlege and D. A. Stockwell was provided by NSF grant #120347.

403

404 |

405 **References**

- 406 Aksenov, Y., Ivanov, V. V., Nurser, A., Bacon, S., Polyakov, I. V., Coward, A. C.,  
 407 Naveira- Garabato, A. C. and Beszczynska-Moeller, A.: The Arctic circumpolar  
 408 boundary current, *Journal of Geophysical Research: Oceans*, 116, C09017,  
 409 doi:10.1029/2010JC006637, 2011.
- 410 Anderson, L., Björk, G., Jutterström, S., Pipko, I., Shakhova, N., Semiletov, I. and  
 411 Wåhlström, I.: East Siberian Sea, an Arctic region of very high biogeochemical  
 412 activity, *Biogeosciences*, 8, 1745-1754, 2011.
- 413 Anderson, L. G., Jutterström, S., Hjalmarsson, S., Wåhlström, I. and Semiletov, I.: Out-  
 414 gassing of CO<sub>2</sub> from Siberian Shelf seas by terrestrial organic matter decomposition,  
 415 *Geophys. Res. Lett.*, 36, 2009.
- 416 [Arrigo, K. R., van Dijken, G., and Pabi, S.: Impact of a shrinking Arctic ice cover on marine](#)  
 417 [primary production. \*Geophys. Res. Lett.\*, 35, L19603, 2007.](#)
- 418 Arrigo, K. R. and van Dijken, G. L.: Secular trends in Arctic Ocean net primary production,  
 419 *J. Geophys. Res.*, 116, C09011, doi:10.1029/2011JC007151, 2011.
- 420 Bauch, D., Torres-Valdes, S., Polyakov, I., Novikhin, A., Dmitrenko, I., McKay, J. and Mix,  
 421 A.: Halocline water modification and along-slope advection at the Laptev Sea  
 422 continental margin, *Ocean Sci.*, 10, 141-154, 2014.
- 423 Codispoti, L., Kelly, V., Thessen, A., Matrai, P., Suttles, S., Hill, V., Steele, M. and Light,  
 424 B.: Synthesis of primary production in the Arctic Ocean: III. Nitrate and phosphate  
 425 based estimates of net community production, *Prog. Oceanogr.*, 110, 126-150, 2013.
- 426 Codispoti, L. A. and Richards, F. A.: Micronutrient distributions in the East Siberian and  
 427 Laptev seas during summer 1963, *Arctic*, 67-83, 1968.
- 428 Cota, G., Pomeroy, L., Harrison, W., Jones, E., Peters, F., Sheldon Jr, W. and Weingartner,  
 429 T.: Nutrients, primary production and microbial heterotrophy in the southeastern  
 430 Chukchi Sea: Arctic summer nutrient depletion and heterotrophy, *Mar. Ecol. Prog.*  
 431 *Ser.*, 135(1), 247-258, 1996.
- 432 Coupel, P., Ruiz-Pino, D., Sicre, M., Chen, J., Lee, S., Schiffrine, N., Li, H. and Gascard, J.:  
 433 The impact of freshening on phytoplankton production in the Pacific Arctic Ocean,  
 434 *Prog. Oceanogr.*, 131, 113-125, 2015.
- 435 Dmitrenko, I. A., Polyakov, I. V., Kirillov, S. A., Timokhov, L. A., Simmons, H. L., Ivanov,  
 436 V. V. and Walsh, D.: Seasonal variability of Atlantic water on the continental slope  
 437 of the Laptev Sea during 2002–2004, *Earth Planet. Sci. Lett.*, 244, 735-743, 2006.
- 438 Dortch, Q. and Postel, J.: Phytoplankton-nitrogen interactions, In: Landry, M.R., and B.M.  
 439 Hickey (eds) *Coastal oceanography of Washington and Oregon*, pp. 139-173,  
 440 Elsevier, Amsterdam, 1989.

서식 있음: 아래 첨자



- 441 Dugdale, R. and Goering, J.: Uptake of new and regenerated forms of nitrogen in primary  
442 productivity, *Limnol. Oceanogr.*, 12, 196-206, 1967.
- 443 Eppley, R. W. and Peterson, B. J.: Particulate organic matter flux and planktonic new  
444 production in the deep ocean, *Nature*, 282, 677-680, 1979.
- 445 Gosselin, M., Levasseur, M., Wheeler, P. A., Horner, R. A. and Booth, B. C.: New  
446 measurements of phytoplankton and ice algal production in the Arctic Ocean, *Deep-  
447 Sea Res, Pt. II: Topical Studies in Oceanography*, 44, 1623-1644, 1997.
- 448 [Grebmeier, J. M., Bluhm, B. A., Coer, L. W., Danielson, S. L., Arrigo, K. R., Blanchard, A.  
449 L., Clarke, J. T., Day, R. H., Frey, K. E., Gradinger, R. R., Kędra, M., Konar, B.,  
450 Kuletz, K. J., Lee, S. H., Lovvorn, J. R., Norcross, B. L. and Okkonen S. R.:  
451 \*Ecosystem characteristics and processes facilitating persistent macrobenthic biomass  
452 hotspots and associated benthivory in the Pacific Arctic. Prog. Oceanogr.\*, 136, 92-  
453 114, 2015.](#)
- 454 Guéguen, C., Guo, L., Yamamoto-Kawai, M. and Tanaka, N.: Colored dissolved organic  
455 matter dynamics across the shelf-basin interface in the western Arctic Ocean, *J.  
456 Geophys. Res.- Oceans*, 112, 2007.
- 457 Hama, T., Miyazaki, T., Ogawa, Y., Iwakuma, T., Takahashi, M., Otsuki, A. and Ichimura,  
458 S.: Measurement of photosynthetic production of a marine phytoplankton  
459 population using a stable <sup>13</sup>C isotope, *Mar. Biol.*, 73, 31-36, 1983.
- 460 [Hill, V., Ardyna, M., Lee, S. H., and Varela, D. E.: Decadal trends in phytoplankton  
461 production in the Pacific Arctic Region from 1950 to 2012, \*Deep-Sea Research II\*,  
462 <https://doi.org/10.1016/j.dsr2.2016.12.015>, 2017.](#)
- 463 Kim, B. K., Joo, H., Song, H. J., Yang, E. J., Lee, S. H., Hahm, D., Rhee, T. S. and Lee, S.  
464 H.: Large seasonal variation in phytoplankton production in the Amundsen Sea,  
465 *Polar Biol.*, 38, 319-331, 2015.
- 466 [Lee, J. H., Lee, D., Kang, J. J., Joo, H. T., Lee, J. H., Lee, H. W., Ahn, S. H., Kang, C. K.  
467 and Lee, S. H.: The effects of different environmental factors on the biochemical  
468 composition of particulate organic matter in Gwangyang Bay, South Korea,  
469 \*Biogeosciences\*, 14, 1903-1917, 2017a.](#)
- 470 [Lee, S. H., Joo, H. T., Lee, J. H., Lee, J. H., Kang, J. J., Lee, H. W., Lee, D. and Kang, C. K.:  
471 \*Seasonal carbon uptake rates of phytoplankton in the northern East/Japan Sea\*,  
472 \*Deep-Sea Research II\*, <http://dx.doi.org/10/1016/j.dsr2.2017.04.009>, 2017b.](#)
- 473 Lee, S. H., Joo, H. M., Liu, Z., Chen, J. and He, J.: Phytoplankton productivity in newly  
474 opened waters of the Western Arctic Ocean, *Deep Sea Research Part II: Topical  
475 Studies in Oceanography*, 81, 18-27, 2012.
- 476 Lee, S. H. and Whitledge, T. E.: Primary and new production in the deep Canada Basin  
477 during summer 2002, *Polar Biol.*, 28, 190-197, 2005.

서식 있음: 위 첨자

- 478 Lee, S. H., Whitley, T. E. and Kang, S.: Recent carbon and nitrogen uptake rates of  
479 phytoplankton in Bering Strait and the Chukchi Sea, *Cont. Shelf Res.*, 27, 2231-  
480 2249, 2007.
- 481 [Lewis, K. M., Mitchell, B. G., van Dijken, G. L. and Arrigo, K. R.: Regional chlorophyll a](#)  
482 [algorithms in the Arctic Ocean and their effect on satellite-derived primary](#)  
483 [production estimates, \*Deep-Sea Research II\*, 130, 14-27, 2016.](#)
- 484 Li, W. K., McLaughlin, F. A., Lovejoy, C. and Carmack, E. C.: Smallest algae thrive as the  
485 Arctic Ocean freshens, *Science*, 326, 539, 2009.
- 486 Macdonald, R. W., Anderson, L.G., Christensen, J. P., Miller, L. A., Semiletov, I. P. and  
487 Stein R.: The Arctic Ocean: Budgets and fluxes, in *Carbon and Nutrient Fluxes in*  
488 *Continental Margins: A Global Synthesis*, edited by Liu K.-K. et al., pp. 291-303,  
489 Springer, New York., 2010
- 490 Matsuoka, A., Hill, V., Huot, Y., Babin, M. and Bricaud, A.: Seasonal variability in the light  
491 absorption properties of western Arctic waters: parameterization of the individual  
492 components of absorption for ocean color applications, *J. Geophys. Res.-Oceans*,  
493 116, 2011.
- 494 Parsons, T. R., Maita, Y. and Lalli C. M. (1984), *A manual of chemical and biological*  
495 *methods for seawater analysis*. Pergamon Press, New York p. 173.
- 496 Polyakov, I., Timokhov, L., Dmitrenko, I., Ivanov, V., Simmons, H., Beszczynska- Möller,  
497 A., Dickson, R., Fahrbach, E., Fortier, L. and Gascard, J.: Observational program  
498 tracks Arctic Ocean transition to a warmer state, *Eos, Transactions American*  
499 *Geophysical Union*, 88, 398-399, 2007.
- 500 [Popova, E. E., Yool, A., Coward, A. C., Aksenov, Y. K., Alderson, S. G., de Cuevas, B. A.,](#)  
501 [and Anderson, T. R.: Control of primary production in the Arctic by nutrients and](#)  
502 [light: insights from a high resolution ocean general circulation model,](#)  
503 [\*Biogeosciences\*, 7, 3569-3591, 2010.](#)
- 504 Rao, D. S., and Platt, T.: Primary production of Arctic waters, *Polar Biol.*, 3(4), 191-201,  
505 1984.
- 506 Semiletov, I., Dudarev, O., Luchin, V., Charkin, A., Shin, K. and Tanaka, N.: The East  
507 Siberian Sea as a transition zone between Pacific-derived waters and Arctic shelf  
508 waters, *Geophys. Res. Lett.*, 32, 2005.
- 509 Smith, W. and Sakshaug, E.: Autotrophic processes in polar regions, *Polar oceanography*.  
510 Part B. Academic Press, San Diego, 477-525, 1990.
- 511 [Son, S. H., Campbell, J., Dowell, M., Yoo, S. and Noh, J.: Primary production in the Yellow](#)

- 512 [Sea determined by ocean color remote sensing, Mar. Ecol. Prog. Ser., 303, 91-103,](#)  
513 [2005.](#)
- 514 [Subba Rao, D. V. and Platt, T.: Primary production of Arctic waters. Polar Biol., 3, 191-210,](#)  
515 [1984.](#)
- 516 [Tremblay, J.-É., Legendre, L., Klein, B., and Therriault, C.: Size-differential uptake of](#)  
517 [nitrogen and carbon in a marginal sea \(Gulf of St. Lawrence, Canada\): Significance](#)  
518 [of diel periodicity and urea uptake. Deep-Sea Research II, 47, 489-518, 2000.](#)
- 519 Whitley, T. E., Malloy, S. C., Patton, C. J. and Wirick, C. D.: Automated nutrient analyses  
520 in seawater (No. BNL-51398), Brookhaven National Lab., Upton, NY (USA), 1981.
- 521 Yun, M. S., Chung, K. H., Zimmermann, S., Zhao, J., Joo, H. M. and Lee, S. H.:  
522 Phytoplankton productivity and its response to higher light levels in the Canada  
523 Basin, Polar Biol., 35, 257-268, 2012.
- 524 Yun, M. S., Kim, B. K., Joo, H. T., Yang, E. J., Nishino, S., Chung, K. H., Kang, S. and Lee,  
525 S. H.: Regional productivity of phytoplankton in the Western Arctic Ocean during  
526 summer in 2010, Deep Sea Research Part II: Topical Studies in Oceanography, 120,  
527 61-71, 2015.
- 528

529 **Table caption**

530 | Table 1. Geographical and physical information ~~of~~ the productivity measurement stations  
531 | in the Laptev and East Siberian seas. Sea ice concentration was retrieved from National  
532 | Snow & Ice Data Center during the cruise period in 2013.

533

534

535 **Figure captions**

536 Figure 1. Hydrographic stations and sea ice concentration in NABOS 2013. Red dots  
537 represent productivity-measured stations. Sea ice concentration data provided from National  
538 Snow & Ice Data Center were averaged during the cruise period in 2013.

539 Figure 2. Vertical distribution of major inorganic nutrient concentrations ( $\mu\text{M}$ ) from surface  
540 to 1 % light depth at the productivity stations in the Laptev and East Siberian seas during the  
541 cruise period in 2013. a)  $\text{NO}_2+\text{NO}_3$ , b)  $\text{NH}_4$ , c)  $\text{PO}_4$ , and d)  $\text{SiO}_4$ .

542 Figure 23. Spatial distribution of major inorganic nutrient concentrations ( $\text{mmol m}^{-2}$ )  
543 integrated from surface to 50 m water depth in the Laptev and East Siberian seas during the  
544 cruise period in 2013. a)  $\text{NO}_2+\text{NO}_3$ , b)  $\text{NH}_4$ , c)  $\text{PO}_4$ , and d)  $\text{SiO}_4$ .

545 Figure 4. Vertical distribution of chl-*a* concentration ( $\text{mg chl-}a \text{ m}^{-3}$ ) from surface to 1 %  
546 light depth at the productivity stations in the Laptev and East Siberian seas during the cruise  
547 period in 2013.

548 Figure 35. Spatial distribution of chl-*a* concentration ( $\text{mg chl-}a \text{ mmol m}^{-2}$ ) integrated from  
549 surface to 50 m water depth in the Laptev and East Siberian seas during the cruise period in  
550 2013.

551 Figure 46. Compositions (%) of size-fractionated chl-*a* concentration ( $\text{mmol m}^{-3}$ )-integrated  
552 from surface to 50 m water depth in the Laptev and East Siberian seas during the cruise

553 period in 2013. a) 100 % light depth, b) 30 % light depth, and c) 1 % light depth.

554 Figure [57](#). Spatial distribution of hourly carbon uptake rates of phytoplankton ( $\text{mg C m}^{-2} \text{h}^{-1}$ )

555 [in the Laptev and East Siberian seas during the cruise period in 2013.](#)

556 Figure [68](#). Spatial distribution of hourly nitrate (red) and ammonium (yellow) uptake rates

557 of phytoplankton ( $\text{mg N m}^{-2} \text{h}^{-1}$ ) [in the Laptev and East Siberian seas during the cruise](#)

558 [period in 2013.](#)

559 Figure [79](#). Spatial distribution of  $f$ -ratio in the Laptev and East Siberian seas during the

560 cruise period in 2013.

561 Table 1. Geographical and physical information of the productivity stations in the Laptev and East Siberian seas. Sea ice concentration was retrieved from National Snow & Ice Data Center during the cruise period in 2013.

| Station | Location          |                  | Date<br>(mm/dd/yyyy) | Depth<br>(m) | Sea surface temperature<br>(°C) | Sea surface salinity<br>(psu) | Sea ice concentration<br>(%) |
|---------|-------------------|------------------|----------------------|--------------|---------------------------------|-------------------------------|------------------------------|
|         | Longitude<br>(°E) | Latitude<br>(°N) |                      |              |                                 |                               |                              |
| AF005   | 109.2031          | 78.7811          | 8/25/2013            | 283          | -0.08                           | 31.42                         | 0                            |
| AF006   | 118.4494          | 77.5925          | 8/26/2013            | 1244         | 0.75                            | 31.36                         | 0                            |
| AF011   | 125.8045          | 77.4005          | 8/27/2013            | 1543         | 1.62                            | 30.01                         | 0                            |
| AF019   | 125.7401          | 79.4156          | 8/28/2013            | 3196         | -1.6                            | 32.44                         | 25                           |
| AF024   | 125.6861          | 80.7248          | 8/29/2013            | 3730         | -1.48                           | 30.96                         | 45                           |
| AF036   | 141.5607          | 80.1791          | 9/1/2013             | 1480         | -1.22                           | 28.29                         | 25                           |
| AF041   | 149.3758          | 79.8456          | 9/2/2013             | 561          | -1.57                           | 29.86                         | 60                           |
| AF044   | 154.9831          | 80.2246          | 9/3/2013             | 1904         | -1.67                           | 30.91                         | 100                          |
| AF049   | 137.7743          | 78.9502          | 9/5/2013             | 1552         | 1.57                            | 29.09                         | 0                            |
| AF057   | 128.8313          | 77.9848          | 9/5/2013             | 2325         | 1.49                            | 30.25                         | 0                            |
| AF061   | 125.825           | 78.399           | 9/6/2013             | 2700         | -0.07                           | 31.39                         | 10                           |
| AF068   | 107.3858          | 79.7628          | 9/10/2013            | 1200         | -0.35                           | 32.57                         | 0                            |
| AF071   | 112.0952          | 82.0163          | 9/11/2013            | 3530         | -1.73                           | 31.86                         | 65                           |
| AF072   | 107.4838          | 81.4388          | 9/12/2013            | 3349         | -1.75                           | 32.37                         | 40                           |
| AF080   | 102.3065          | 80.6008          | 9/13/2013            | 315          | -1.14                           | 32.81                         | 0                            |
| AF091   | 97.5466           | 82.3014          | 9/14/2013            | 2959         | -1.32                           | 33.3                          | 0                            |
| AF095   | 94.7876           | 83.7409          | 9/15/2013            | 3668         | -1.76                           | 32.36                         | 40                           |
| AF100   | 90.0078           | 83.7489          | 9/16/2013            | 3410         | -1.49                           | 33.29                         | 0                            |
| AF116   | 66.8714           | 81.3366          | 9/19/2013            | 530          | 0.47                            | 33.44                         | 0                            |

562  
563

2

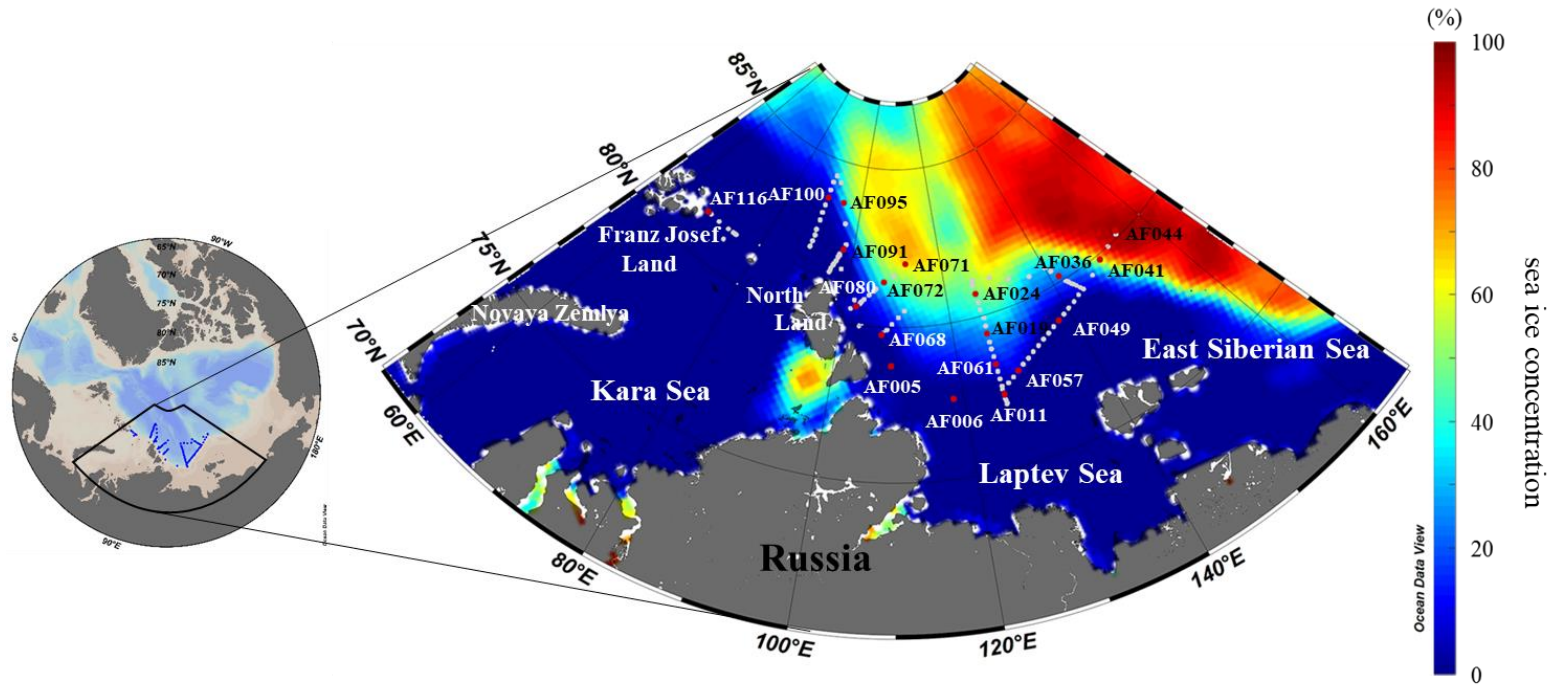

Fig. 1. Hydrographic stations and sea ice concentration in NABOS 2013. Red dots represent productivity-measured stations. Sea ice concentration data provided from National Snow & Ice Data Center were averaged during the cruise period in 2013.



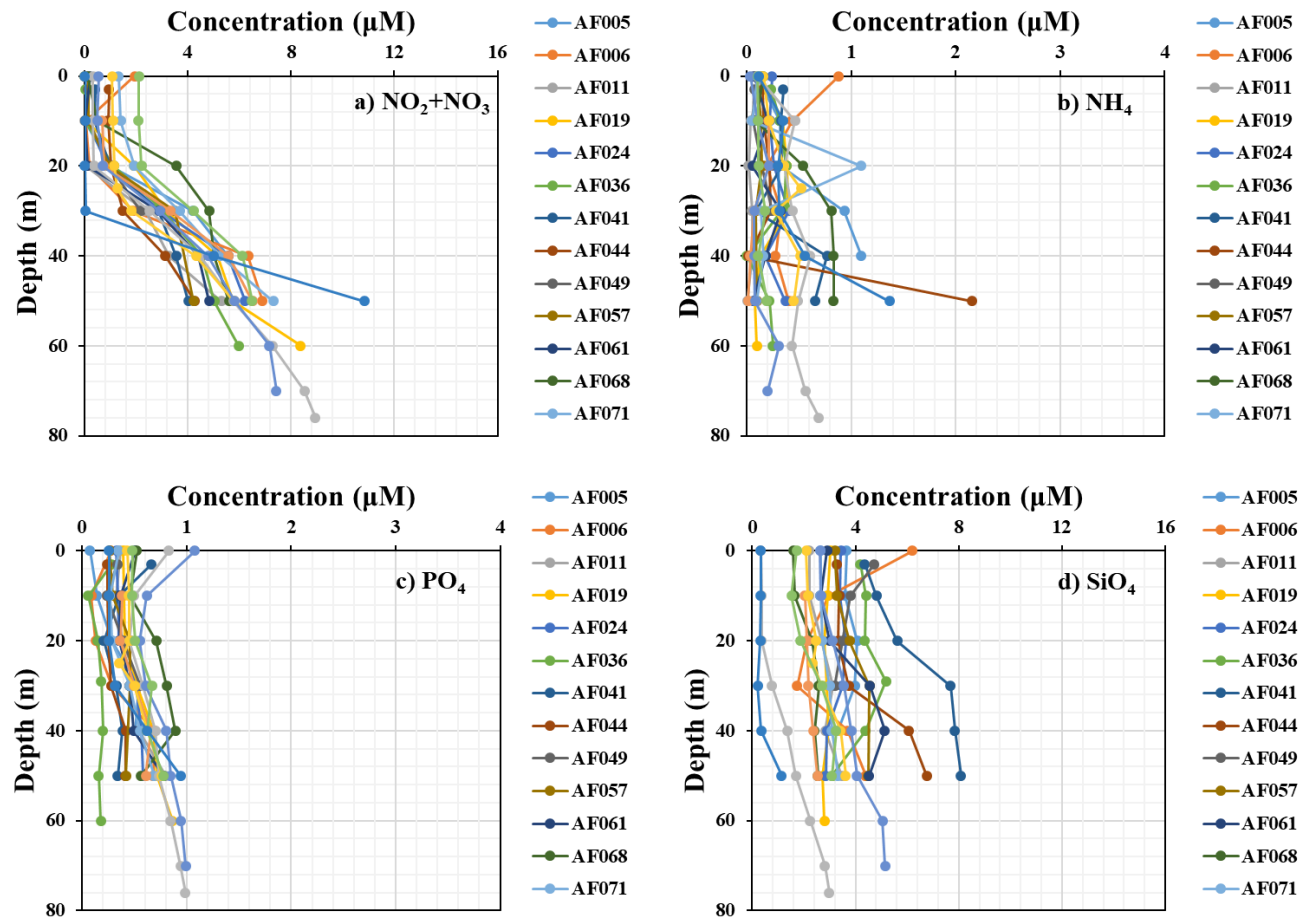

Fig. 22. Vertical distribution of major inorganic nutrient concentrations (µM) from surface to 1 % light depth at the productivity stations in the Laptev and East Siberian seas during the cruise period in 2013. a)  $\text{NO}_2+\text{NO}_3$ , b)  $\text{NH}_4$ , c)  $\text{PO}_4$ , and d)  $\text{SiO}_4$ .

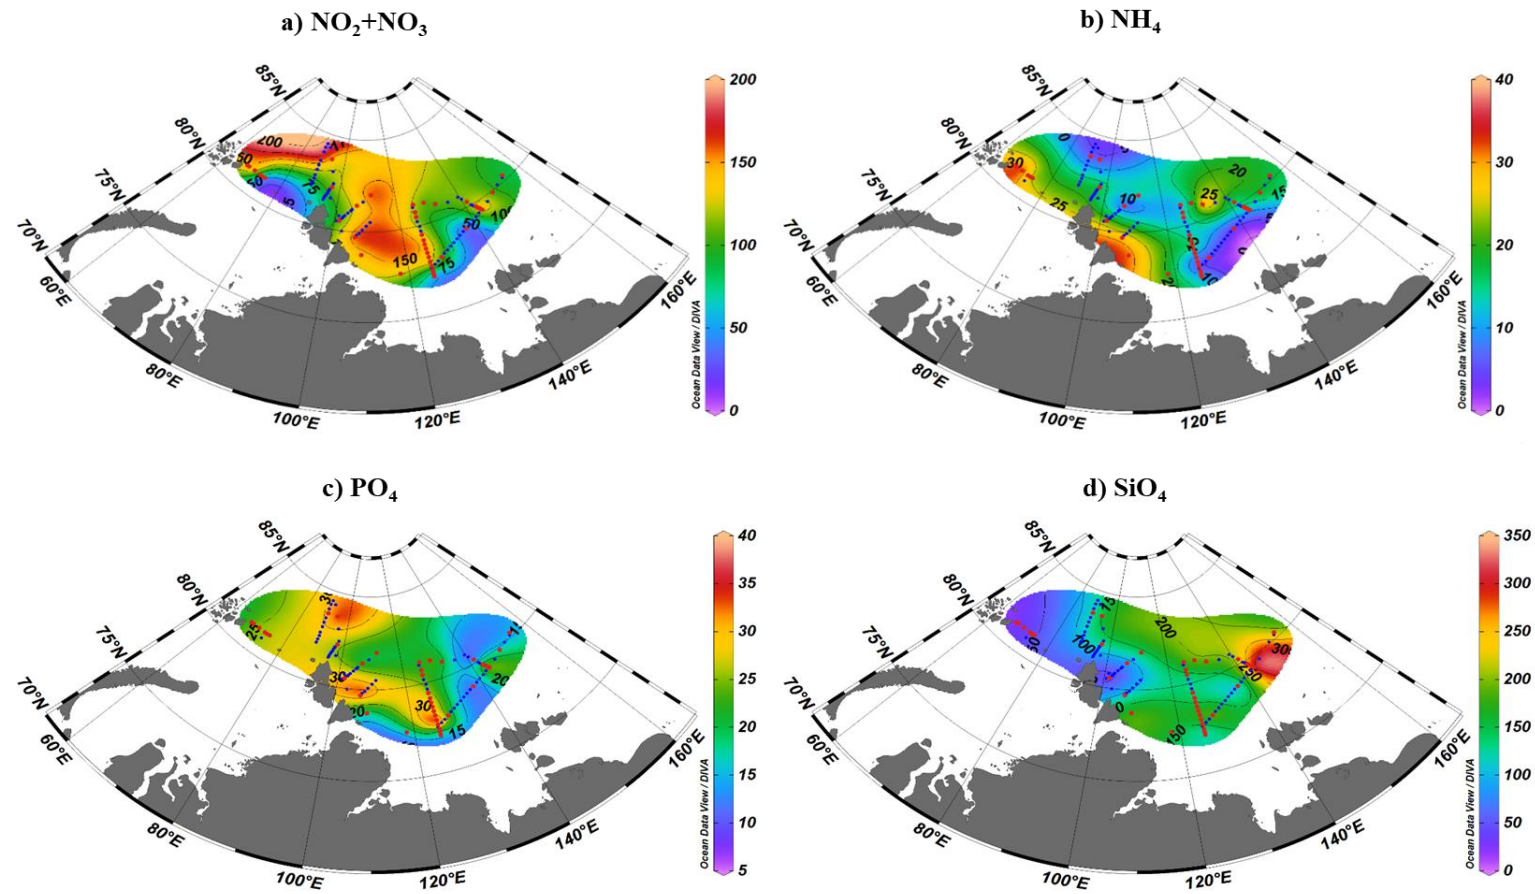

565 | Fig. 23. Spatial distribution of major inorganic nutrient concentrations ( $\text{mmol m}^{-2}$ ) integrated from surface to 50 m water depth in the Laptev and East Siberian seas during the cruise period in 2013. a)  $\text{NO}_2+\text{NO}_3$ , b)  $\text{NH}_4$ , c)  $\text{PO}_4$ , and d)  $\text{SiO}_4$ .

서식 있음: 아래 첨자

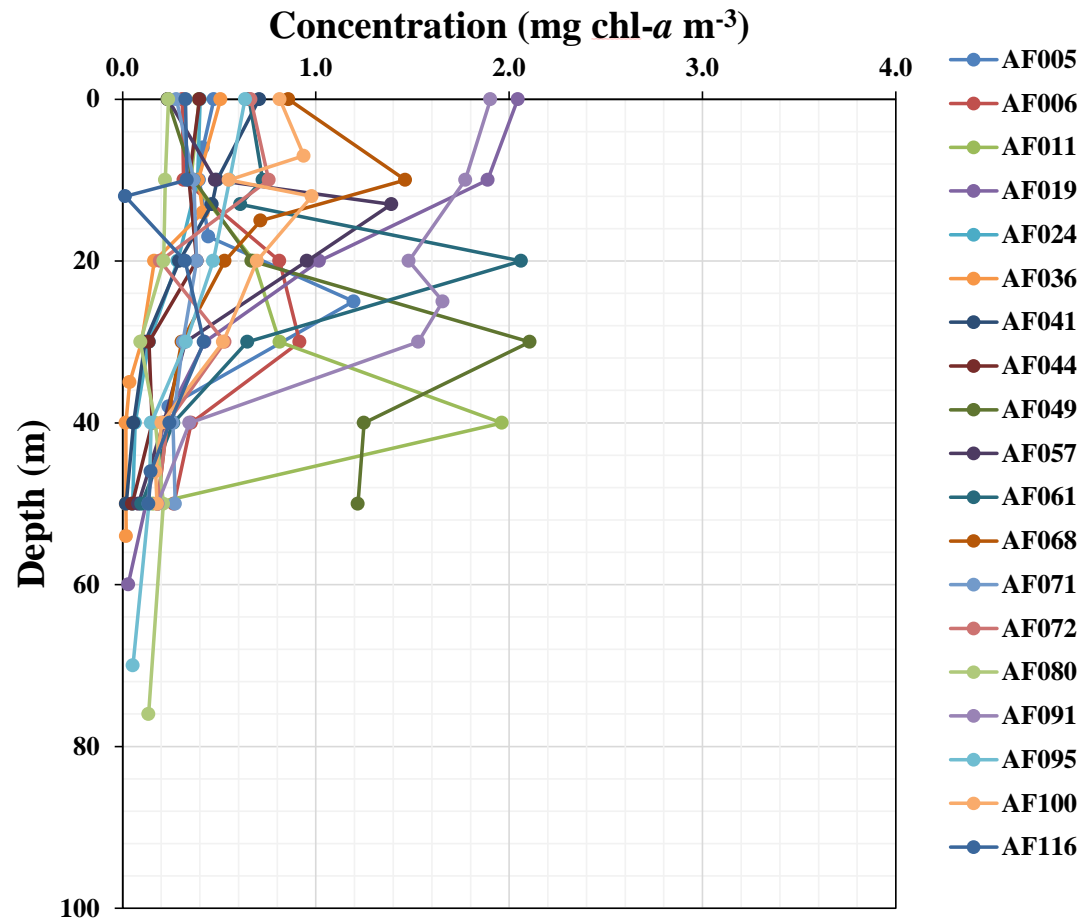

Fig. 24. Vertical distribution of chl-*a* concentration (mg chl-*a* m<sup>-3</sup>) from surface to 1 % light depth at the productivity stations in the Laptev and East Siberian seas during the cruise period in 2013. 5

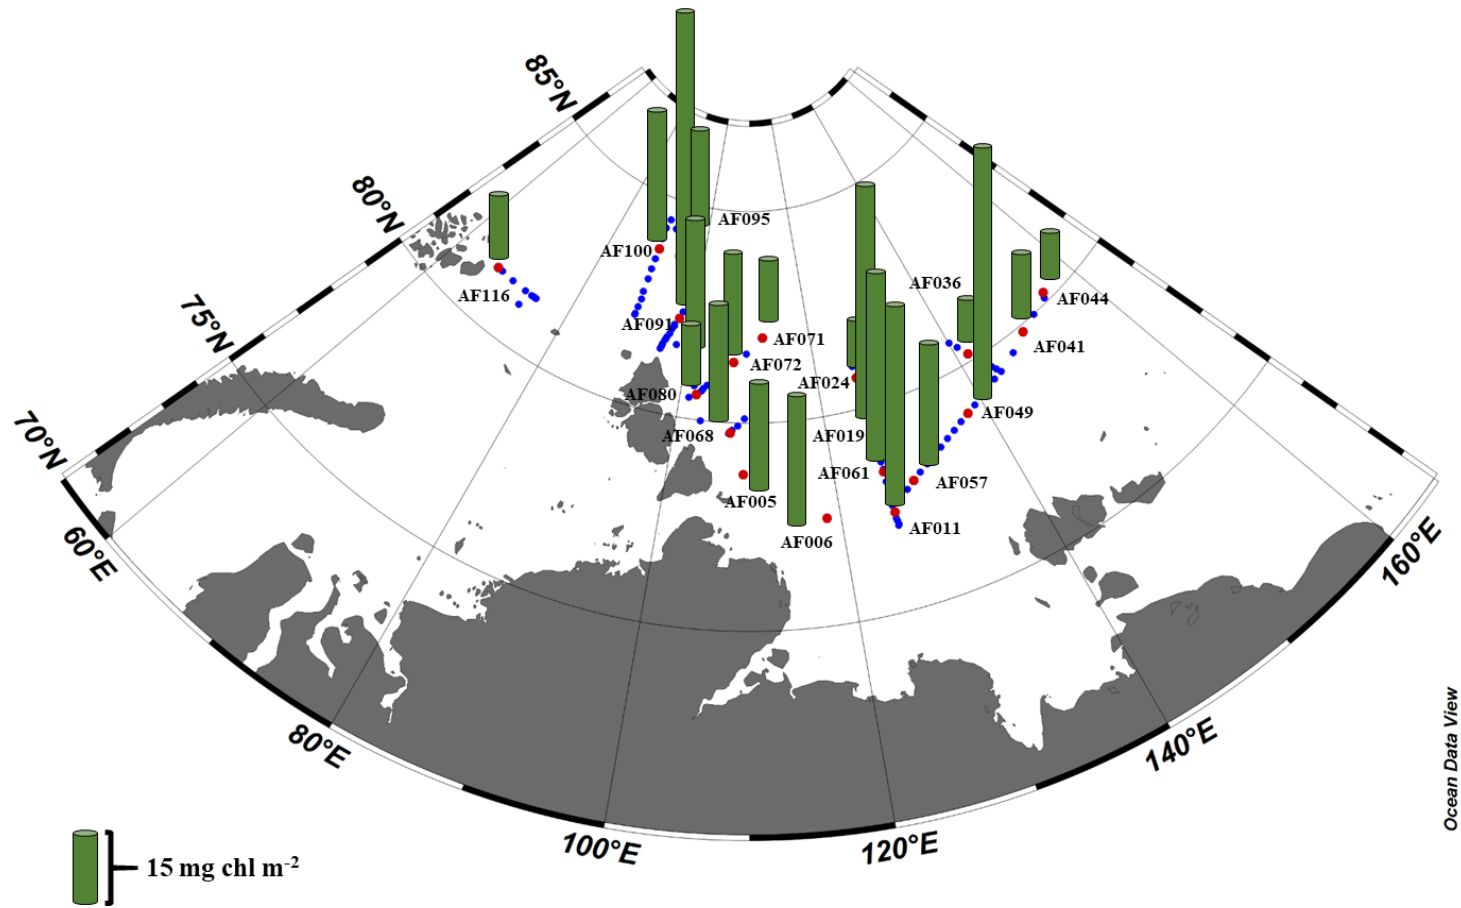

Fig. 35. Spatial distribution of chl-a concentration ( $\text{mg chl-a mmol-m}^{-2}$ ) integrated from surface to 50 m water depth in the Laptev and East Siberian seas during the cruise period in 2013.

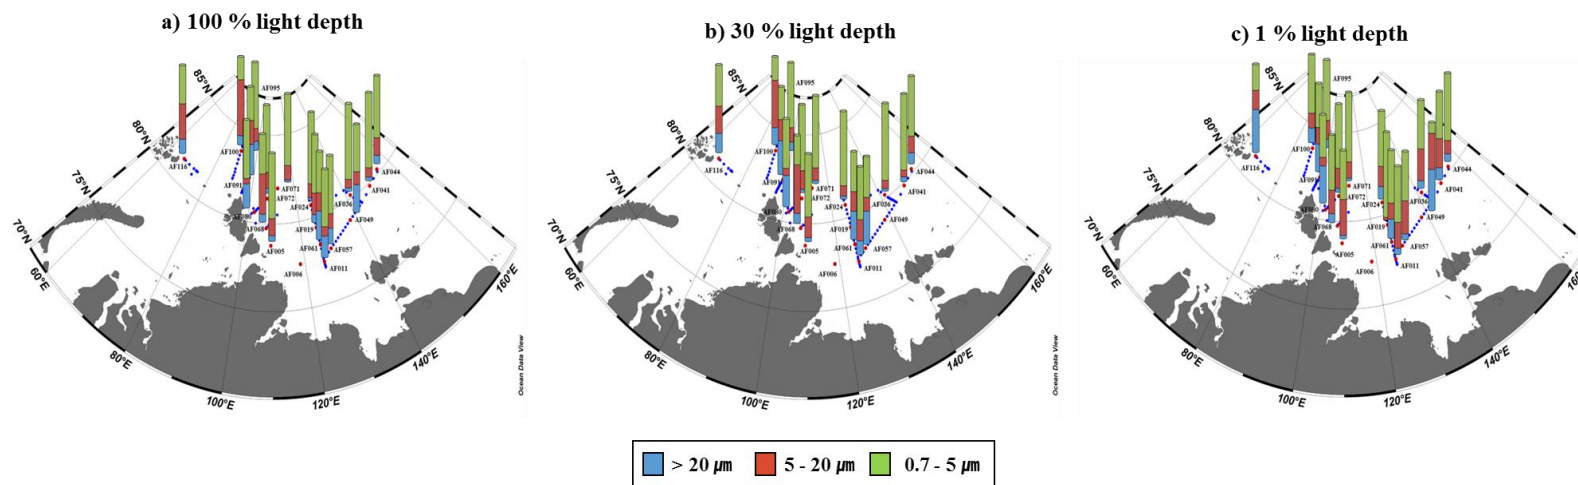

Fig. 46. Compositions (%) of size-fractionated chl-a concentration ( $\text{mmol m}^{-2}$ ) integrated from surface to 50 m water depth in the Laptev and East Siberian seas during the cruise period in 2013. a) 100 % light depth, b) 30 % light depth, and c) 1 % light depth.

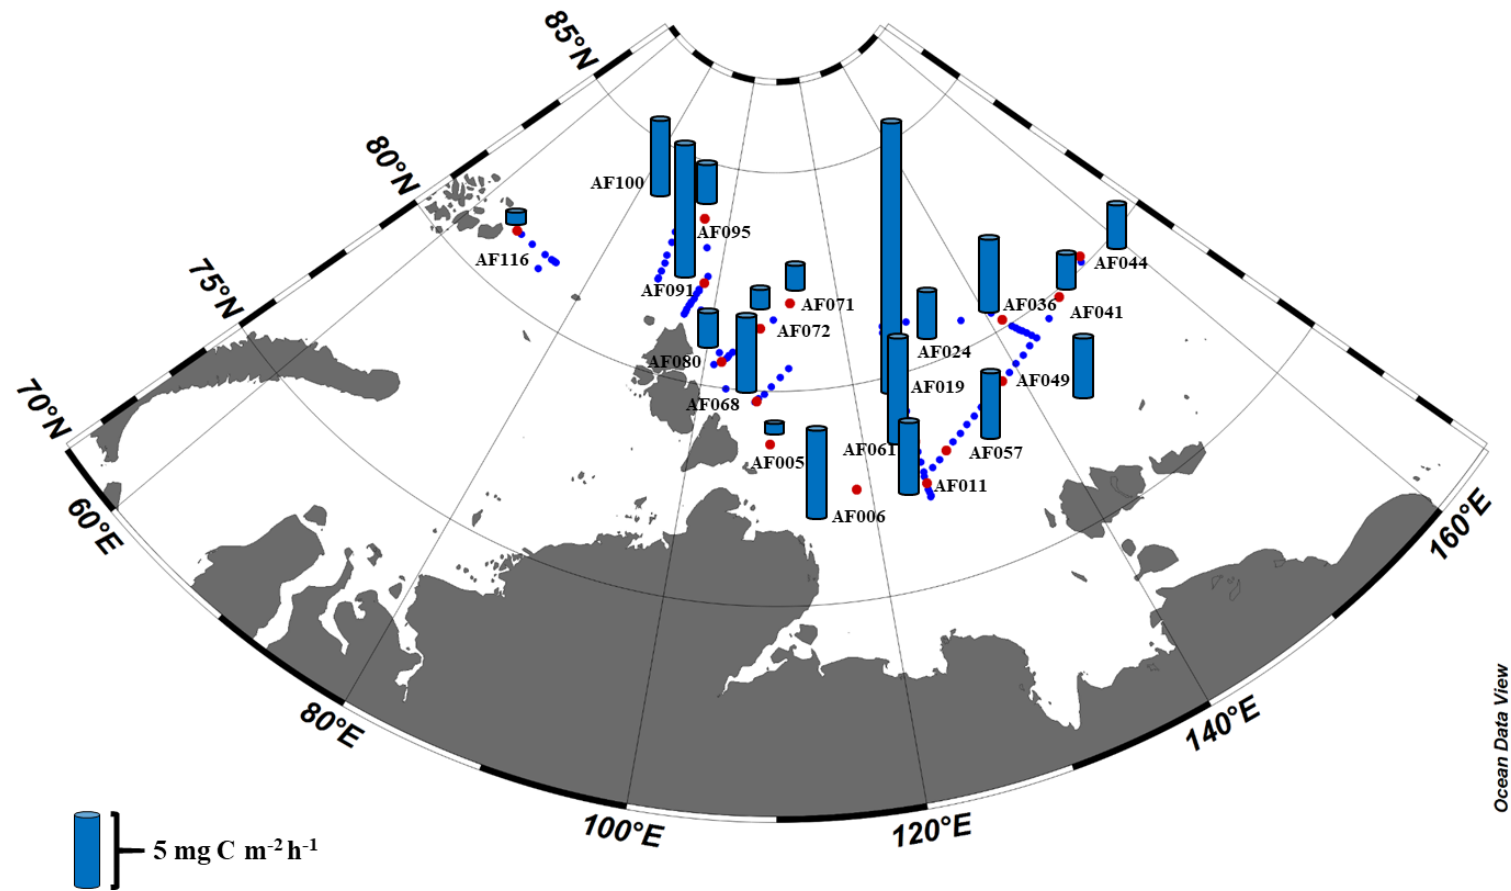

569

Fig. 57. Spatial distribution of hourly carbon uptake rates of phytoplankton ( $\text{mg C m}^{-2} \text{h}^{-1}$ ) in the Laptev and East Siberian seas during the cruise period in 2013.

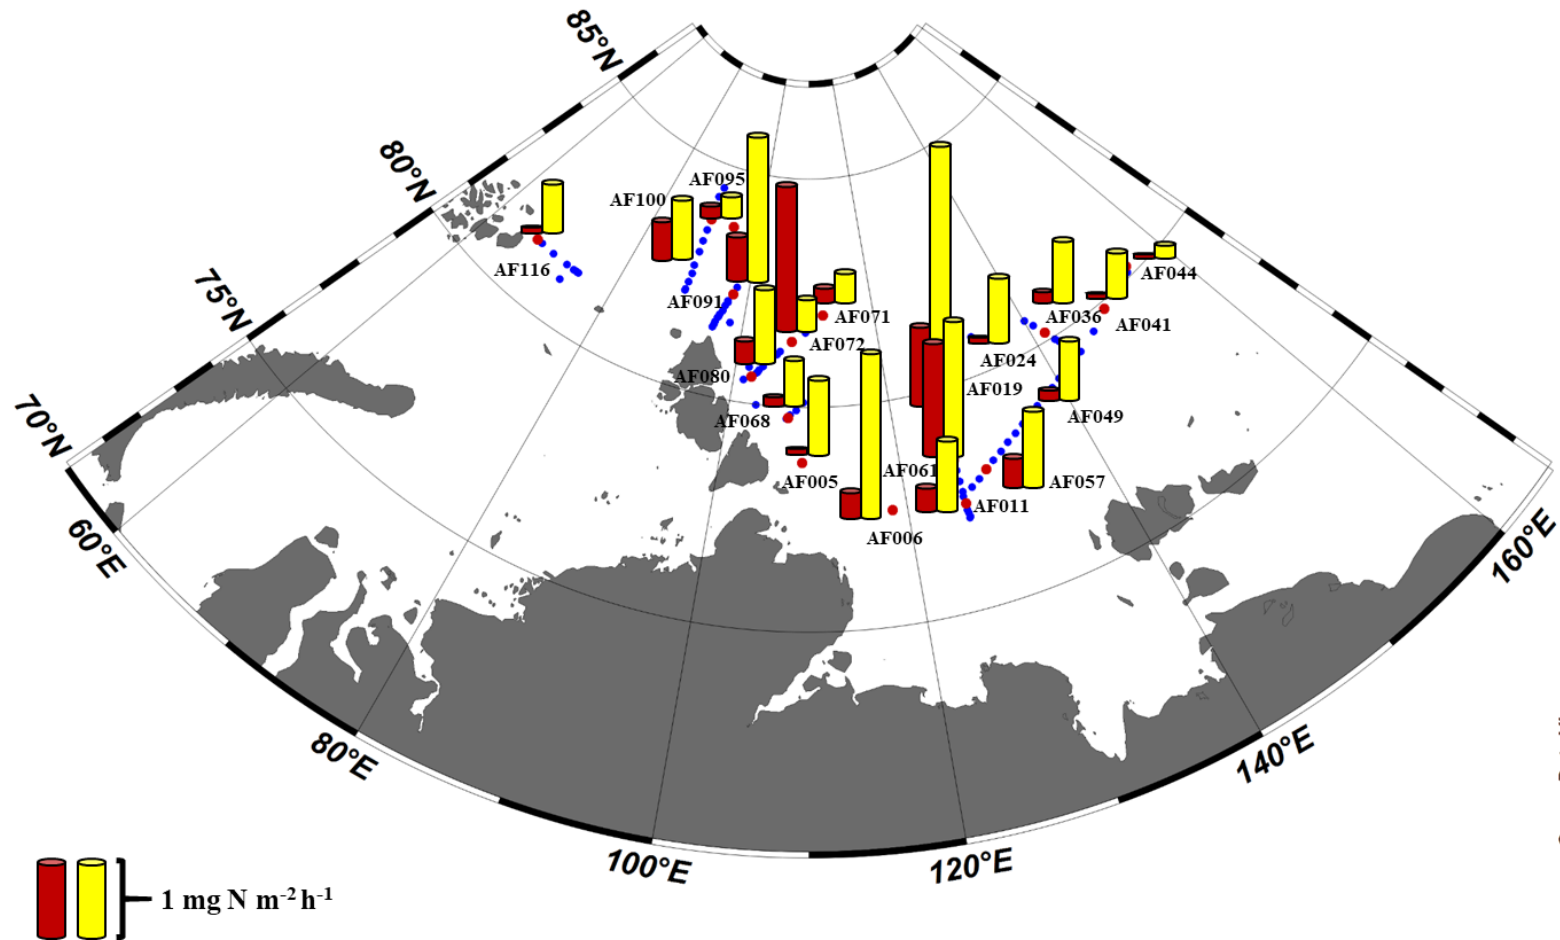

570

Fig. 68. Spatial distribution of hourly nitrate (red) and ammonium (yellow) uptake rates of phytoplankton ( $\text{mg N m}^{-2} \text{h}^{-1}$ ) in the Laptev and East Siberian seas during the cruise period in 2013.

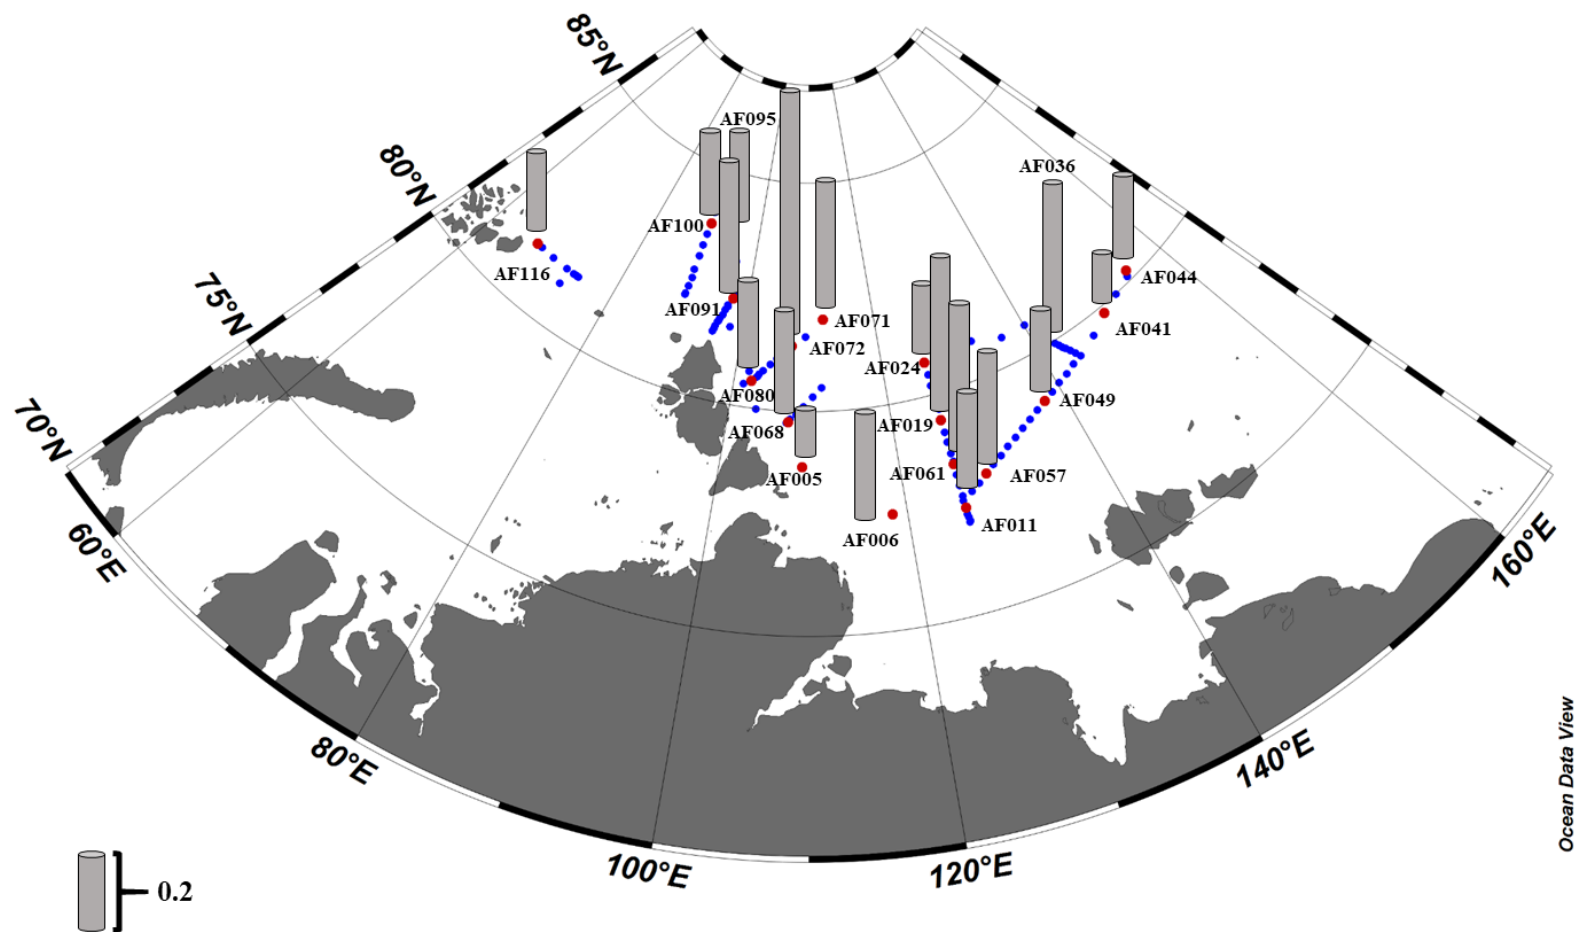

571

Fig. 79. Spatial distribution of  $f$ -ratio in the Laptev and East Siberian seas during the cruise period in 2013.
